# Supplementary material
Source: PubMed Central journal article supplement (PMC4127979)
Supplement: NIHMS487691-supplement-supplement_1.pdf [file NIHMS487691-supplement-supplement_1.pdf]

**Supplemental Table 1: Primers Used for Quantitative Real-Time PCR**

| <b>Target Gene</b> |         | <b>Primer Sequence</b>      |
|--------------------|---------|-----------------------------|
| <i>BMP2</i>        | Forward | 5'-CTGTATCGCAGGCACTCA-3'    |
|                    | Reverse | 5'-CTCCGTGGGGATAGAACTT-3'   |
| <i>OPN</i>         | Forward | 5'-GATGGCCGAGGTGATAGTGT-3'  |
|                    | Reverse | 5'-CCATTCAACTCCTCGCTTTC-3'  |
| <i>GAPDH</i>       | Forward | 5'-AACGTGTCAGTGGTGGACCTG-3' |
|                    | Reverse | 5'-AGTGGGTGTCGCTGTTGAAGT-3' |

**Supplemental Table 2: Predicted Impact of the Three Replicated PhosSNPs on Protein Phosphorylation**

| Position of Effect Residue             | Code of Effect Residue | Protein Kinase     | *Effect Peptide(7,7) | Nucleotide Accession No. | Type of phosSNP |
|----------------------------------------|------------------------|--------------------|----------------------|--------------------------|-----------------|
| rs16861032   pos=275   CTA->GTA   L->V |                        |                    |                      | NM_144718                | II (+)          |
| 279                                    | Y                      | TK/Fer             | TETVDSSYVVGHVLN      |                          |                 |
| 279                                    | Y                      | TK/Met/Met         | TETVDSSYVVGHVLN      |                          |                 |
| 279                                    | Y                      | TK/Tec/BTK         | TETVDSSYVVGHVLN      |                          |                 |
| 279                                    | Y                      | TK/VEGFR/FLT4      | TETVDSSYVVGHVLN      |                          |                 |
| rs16861032   pos=275   CTA->GTA   L->V |                        |                    |                      | NM_144718                | II (-)          |
| 278                                    | S                      | TKL/STKR           | STETLDSSYVVGHVLN     |                          |                 |
| rs16861032   pos=275   CTA->GTA   L->V |                        |                    |                      | NM_144718                | III (-)         |
| 271                                    | S                      | TKL/STKR           | TRLQPEESTETLDSS      |                          |                 |
| 271                                    | S                      | AGC/GRK/GRK/GRK-4  | TRLQPEESTETLDSS      |                          |                 |
| rs2657879   pos=581   CTC->CCC   L->P  |                        |                    |                      | NM_013267                | II (+)          |
| 582                                    | S                      | AGC/GRK            | YQDSYTPSETQAEAA      |                          |                 |
| 582                                    | S                      | CMGC/DYRK/Dyrk1    | YQDSYTPSETQAEAA      |                          |                 |
| 582                                    | S                      | STE/STE-Unique/NIK | YQDSYTPSETQAEAA      |                          |                 |
| 582                                    | S                      | AGC/GRK/BARK/GRK-2 | YQDSYTPSETQAEAA      |                          |                 |
| rs2657879   pos=581   CTC->CCC   L->P  |                        |                    |                      | NM_013267                | III (+)         |
| 575                                    | Y                      | TK/FGFR            | VVKLLQDYQDSYTPS      |                          |                 |
| 578                                    | S                      | TKL/RAF            | LLQDYQDSYTPSETQ      |                          |                 |
| 578                                    | S                      | STE/STE-Unique/COT | LLQDYQDSYTPSETQ      |                          |                 |
| 578                                    | S                      | Other/AUR/AUR-A    | LLQDYQDSYTPSETQ      |                          |                 |
| 578                                    | S                      | AGC/RSK/RSK/RSK1   | LLQDYQDSYTPSETQ      |                          |                 |
| 579                                    | Y                      | TK/Csk             | LQDYQDSYTPSETQA      |                          |                 |
| 579                                    | Y                      | TK/EGFR            | LQDYQDSYTPSETQA      |                          |                 |
| 579                                    | Y                      | TK/Syk             | LQDYQDSYTPSETQA      |                          |                 |
| 579                                    | Y                      | TK/Src/Lyn         | LQDYQDSYTPSETQA      |                          |                 |
| 579                                    | Y                      | TK/Syk/Syk         | LQDYQDSYTPSETQA      |                          |                 |

|                                       |   |                      |                          |           |         |
|---------------------------------------|---|----------------------|--------------------------|-----------|---------|
| 580                                   | T | CMGC                 | QDYQDSYTPSETQAE          |           |         |
| 580                                   | T | CMGC/CDK             | QDYQDSYTPSETQAE          |           |         |
| 580                                   | T | CMGC/GSK             | QDYQDSYTPSETQAE          |           |         |
| 580                                   | T | Other/CK2            | QDYQDSYTPSETQAE          |           |         |
| 580                                   | T | Other/PLK            | QDYQDSYTPSETQAE          |           |         |
| 580                                   | T | CMGC/CDK/CDC2        | QDYQDSYTPSETQAE          |           |         |
| 580                                   | T | CMGC/MAPK/ERK        | QDYQDSYTPSETQAE          |           |         |
| 580                                   | T | CMGC/MAPK/JNK        | QDYQDSYTPSETQAE          |           |         |
| 580                                   | T | CMGC/MAPK/p38        | QDYQDSYTPSETQAE          |           |         |
| 580                                   | T | Other/CK2/CK2a       | QDYQDSYTPSETQAE          |           |         |
| 580                                   | T | Other/IKK/IKKa       | QDYQDSYTPSETQAE          |           |         |
| 580                                   | T | CMGC/CDK/CDC2/CDC2   | QDYQDSYTPSETQAE          |           |         |
| 580                                   | T | CMGC/CDK/CDC2/CDK2   | QDYQDSYTPSETQAE          |           |         |
| 580                                   | T | CMGC/MAPK/ERK/MAPK1  | QDYQDSYTPSETQAE          |           |         |
| 580                                   | T | CMGC/MAPK/ERK/MAPK3  | QDYQDSYTPSETQAE          |           |         |
| 580                                   | T | CMGC/MAPK/JNK/MAPK8  | QDYQDSYTPSETQAE          |           |         |
| 580                                   | T | CMGC/MAPK/JNK/MAPK1  | QDYQDSYTPSETQAE          |           |         |
| 580                                   | T | 0                    |                          |           |         |
| 580                                   | T | CMGC/MAPK/p38/MAPK11 | QDYQDSYTPSETQAE          |           |         |
| 580                                   | T | CMGC/MAPK/p38/MAPK14 | QDYQDSYTPSETQAE          |           |         |
| rs2657879   pos=581   CTC->CCC   L->P |   |                      |                          | NM_013267 | III (-) |
| 575                                   | Y | TK/Eph               | VVKLLQDYQDSYTL <u>S</u>  |           |         |
| 575                                   | Y | TK/VEGFR/FLT1        | VVKLLQDYQDSYTL <u>S</u>  |           |         |
| 580                                   | T | AGC/GRK              | QDYQDSYTL <u>SETQAE</u>  |           |         |
| 580                                   | T | TKL/MLK              | QDYQDSYTL <u>SETQAE</u>  |           |         |
| 580                                   | T | TKL/MLK/ILK          | QDYQDSYTL <u>SETQAE</u>  |           |         |
| rs6265   pos=66   GTG->ATG   V->M     |   |                      |                          | NM_001709 | II (-)  |
| 62                                    | T | CAMK/RAD53           | GLTSLADTFEH <u>V</u> IEE |           |         |

**Note:** The impacts of the identified phosSNPs on protein phosphorylation were predicted by GPS2.0 (12).

\*Underlined residues are encoded by phosSNP-harboring codon. Residues right in the middle are affected phosphorylation sites.

Type II phosSNP: a nsSNP that creates (+) or removes (-) one or multiple phosphorylation site(s) adjacent to the SNP.

Type III phosSNP: a nsSNP that changes the type of protein kinase for one or multiple phosphorylation site (s) adjacent to the SNP.
